# Supplementary material
Source: PubMed Central journal article supplement (PMC5666611)
Supplement: EMBJ-36-3212-s001.pdf [file EMBJ-36-3212-s001.pdf]

# APPENDIX

Parisis *et al.*

Initiation of DNA replication requires actin dynamics and formin activity

## Contents:

- Appendix Figure & Table Legends
- Appendix Figures S1–S3
- Appendix Tables S1–S2

### **Appendix Fig S1**

**A** Immunofluorescence images of U2OS cells transfected with the indicated FLAG-tagged actin-NLS constructs. DNA was stained with DAPI, actin-NLS constructs with anti-Flag antibody. Bar, 5 $\mu$ m.

**B** Scatter plots showing the high reproducibility of MS/MS runs between replicates.

### **Appendix Fig S2**

Immunofluorescent images of a time course of nuclear formation in control (Ctl), or Cyt D (CD) or SMIFH2-treated extract; nuclei were stained with Hoechst. Bar, 10 $\mu$ m.

### **Appendix Fig S3**

Additional FEISEM images of numerous nuclei formed either in control XEE, or in the presence of Cyt D or SMIFH2.

### **Appendix Table S1**

Actin regulators identified in the structure proteome of nuclei.

### **Appendix Table S2**

List of formins in the structure proteome of nuclei in our dataset (X. tropicalis database).

# Appendix Fig S1

**A** actin-NLS-FLAG

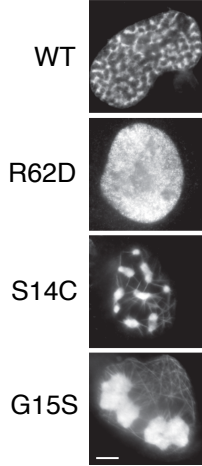

**B**

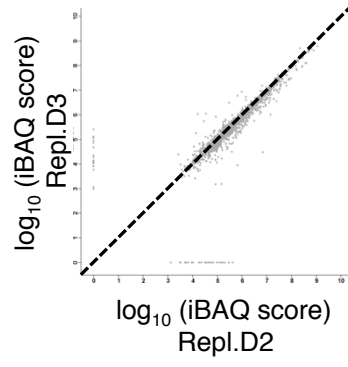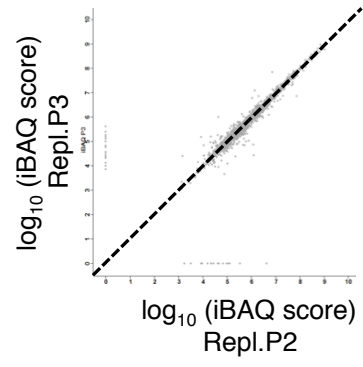

**Appendix Fig S2**

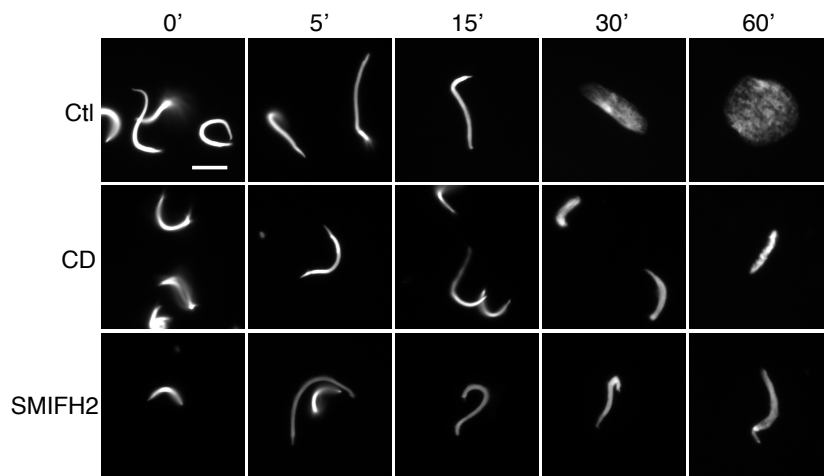

Appendix Fig S3

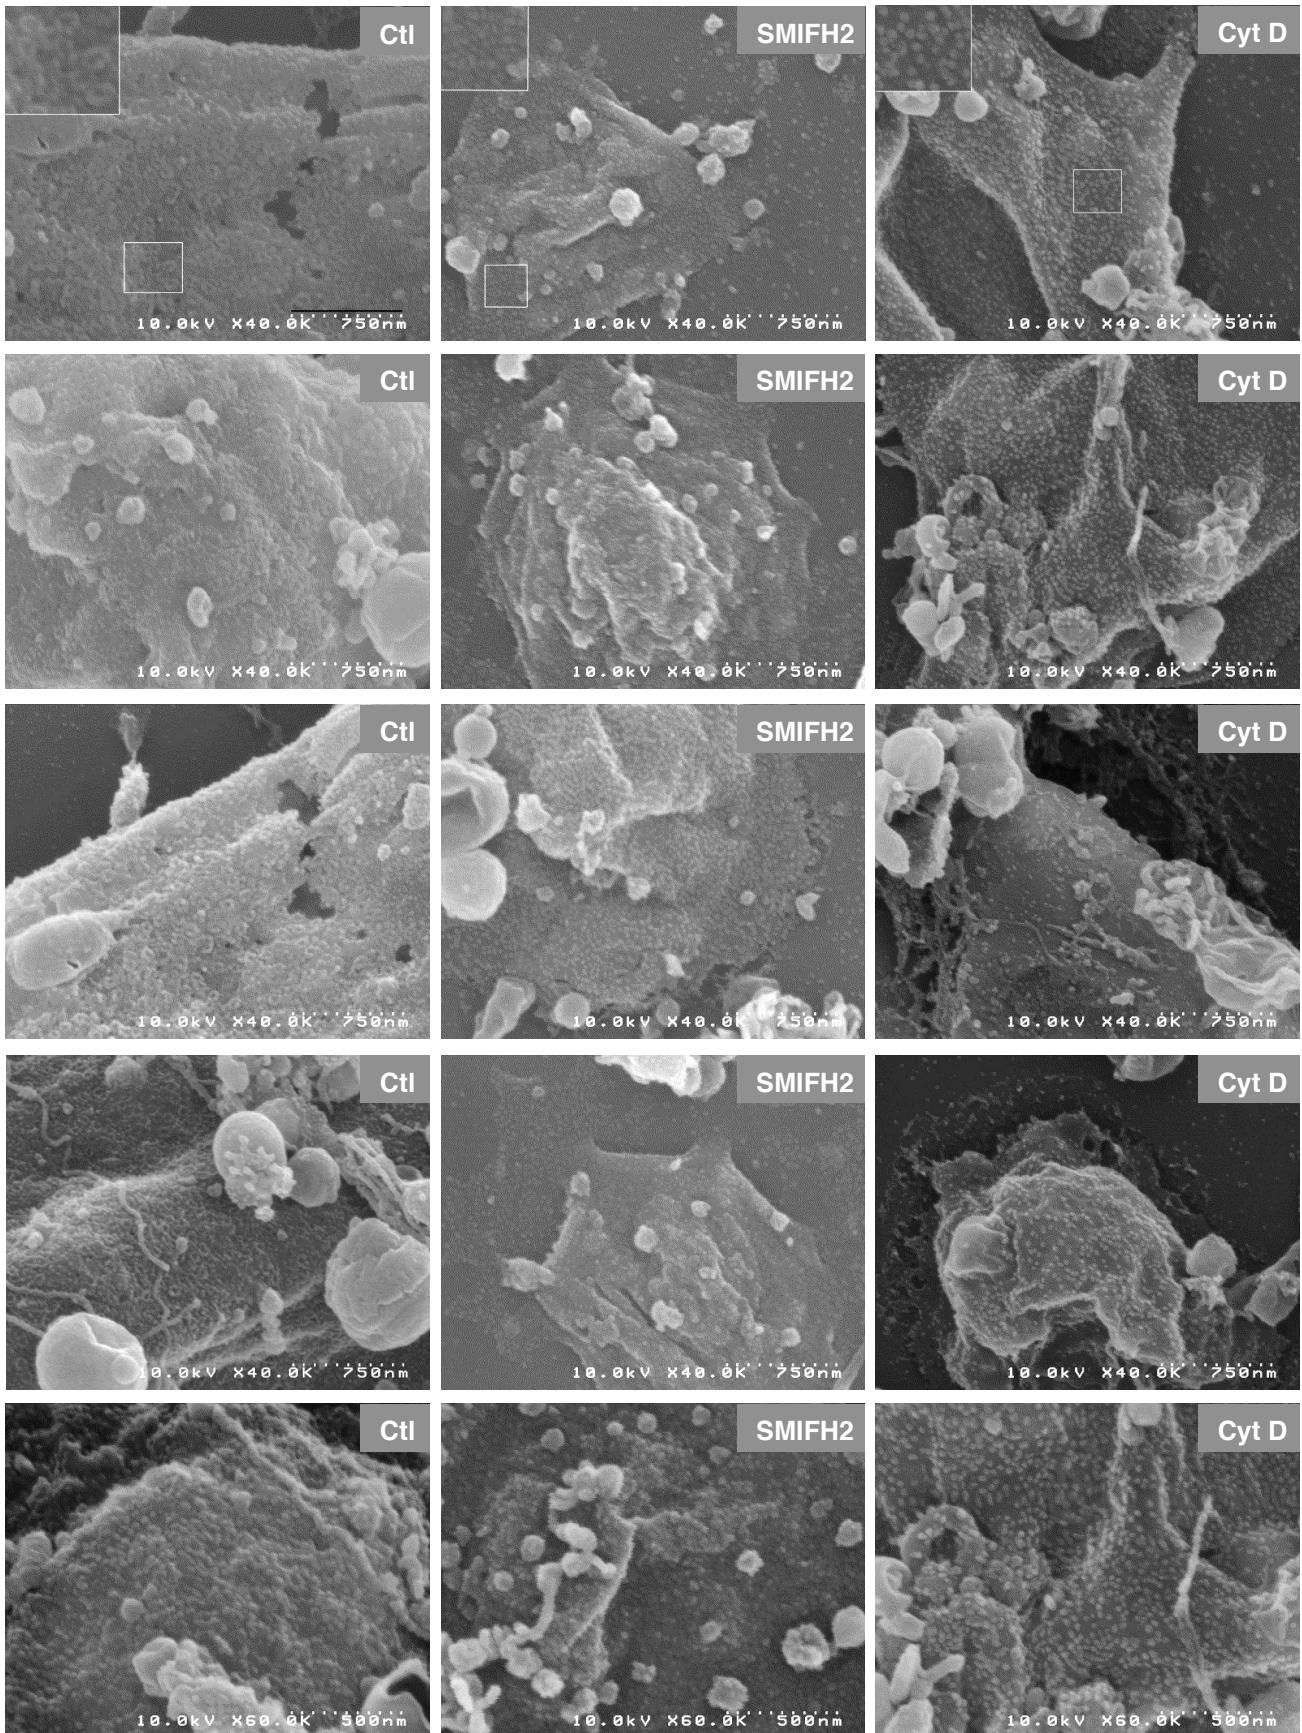

**Appendix Table S1**

| <b>Protein or gene name</b>                                                                   | <b>Log<sub>10</sub> Mean iBAQ values</b> |                       |
|-----------------------------------------------------------------------------------------------|------------------------------------------|-----------------------|
|                                                                                               | <b>Ctl</b>                               | <b>PA (CDK-inhib)</b> |
| actin-related protein 2-A                                                                     | 8.72                                     | 8.84                  |
| Actin-related protein 2/3 complex subunit 4                                                   | 8.56                                     | 8.73                  |
| ARP3 actin-related protein 3                                                                  | 8.51                                     | 8.70                  |
| capping protein muscle Z-line. beta – capzb                                                   | 8.33                                     | 8.54                  |
| capping protein muscle Z-line. alpha 2                                                        | 8.12                                     | 8.33                  |
| Actin-related protein 2/3 complex subunit 2                                                   | 8.11                                     | 8.37                  |
| ISWI protein                                                                                  | 7.97                                     | 8.01                  |
| Actin-related protein 2/3 complex subunit 3                                                   | 7.8                                      | 8.04                  |
| Actin-related protein 2/3 complex subunit 1A                                                  | 7.63                                     | 7.76                  |
| LIM domain and actin binding 1                                                                | 7.60                                     | 7.70                  |
| Coronin 1C                                                                                    | 7.53                                     | 7.64                  |
| actinin alpha 4                                                                               | 7.52                                     | 7.70                  |
| F-actin-capping protein subunit alpha-1                                                       | 7.51                                     | 7.75                  |
| actin-like 6A                                                                                 | 7.51                                     | 7.44                  |
| ARP1 actin-related protein 1 homolog A                                                        | 7.49                                     | 7.44                  |
| Smarcc1 protein                                                                               | 7.49                                     | 7.38                  |
| Cortactin – Ctnn                                                                              | 7.43                                     | 7.53                  |
| Actin-related protein 2/3 complex subunit 5                                                   | 7.42                                     | 7.70                  |
| SWI/SNF-related matrix-associated actin-dependent regulator of chromatin subfamily B member 1 | 7.41                                     | 7.38                  |
| Cofilin 1A                                                                                    | 7.15                                     | 7.44                  |

|                                                                                                       |      |      |
|-------------------------------------------------------------------------------------------------------|------|------|
| Smarce1                                                                                               | 7.14 | 7.16 |
| Smarcd2                                                                                               | 7.01 | 7.02 |
| SWI/SNF related matrix associated actin dependent regulator of chromatin subfamily c member 2         | 7.01 | 7.02 |
| MICAL-like 2                                                                                          | 7.00 | 7.00 |
| MGC131041                                                                                             | 6.88 | 7.14 |
| Rho GTPase activating protein 1                                                                       | 6.81 | 6.97 |
| Vasp                                                                                                  | 6.81 | 6.90 |
| Cofilin 1B                                                                                            | 6.8  | 7.30 |
| Smarcd1                                                                                               | 6.76 | 6.64 |
| Actin-related protein 2/3 complex subunit 1b                                                          | 6.75 | 6.91 |
| actin related protein 2/3 complex. subunit 1B                                                         | 6.75 | 6.91 |
| SWI/SNF-related matrix-associated actin-dependent regulator of chromatin subfamily A-like protein 1   | 6.67 | 6.45 |
| WASP                                                                                                  | 6.55 | 6.69 |
| Actin-binding LIM protein 2                                                                           | 6.37 | 6.65 |
| WD repeat-containing protein 1-A                                                                      | 5.92 | 6.55 |
| actin related protein 2/3 complex. subunit 3                                                          | 5.85 | 5.60 |
| Rho GTPase activating protein 21                                                                      | 5.81 | 5.64 |
| Profilin                                                                                              | 5.50 | 5.72 |
| TRIO and F-actin binding protein                                                                      | 5.35 | 5.51 |
| Rho GTPase activating protein 5                                                                       | 5.16 | 5.15 |
| WD repeat-containing protein 1-B                                                                      | 5.01 | 5.56 |
| Rho-associated kinase alpha                                                                           | 4.91 | 5.39 |
| Rho GDP-dissociation inhibitor 2                                                                      | 4.88 | 6.03 |
| ARP8 actin-related protein 8 homolog                                                                  | 4.85 | 5.14 |
| Afadin- and alpha-actinin-binding protein                                                             | 4.83 | 5.24 |
| SWI/SNF-related matrix-associated actin-dependent regulator of chromatin subfamily E member 1-related | 4.81 | 4.94 |
| Actin-related protein 10 homolog                                                                      | 4.72 | 4.97 |
| Coronin 2B                                                                                            | 4.70 | 5.19 |
| Rho GTPase activating protein 35                                                                      | 4.68 | 4.75 |
| Anillin                                                                                               | 4.40 | 5.16 |
| Rho GTPase activating proteins 18                                                                     | 0    | 4.73 |

|      |   |      |
|------|---|------|
| CNN3 | 0 | 5.25 |
|      |   |      |



**Appendix Table S2**

| <b>Gene names</b> | <b>Fasta headers</b>                                                  | <b>No of peptides</b> |         |
|-------------------|-----------------------------------------------------------------------|-----------------------|---------|
|                   |                                                                       | Ctl                   | CDK-inh |
| diaph1            | F6UXX7_XENTR Uncharacterized protein OS=Xenopus tropicalis            | 4                     | 4       |
| diaph3            | F6VAH9_XENTR Uncharacterized protein (Fragment) OS=Xenopus tropicalis | 3                     | 3       |
| fmn2              | F6UL32_XENTR Uncharacterized protein OS=Xenopus tropicalis            | 2                     | 3       |
