# Supplementary material
Source: PubMed Central journal article supplement (PMC5666611)
Supplement: EMBJ-36-3212-s002.pdf [file EMBJ-36-3212-s002.pdf]

**Figure EV1. Blocking formins inhibits DNA replication and general transcription and causes replication stress in human cells.**

- A FACS analysis of M-phase-synchronised U2OS cells, released into G1 in the presence of increasing concentrations of SMIFH2. Cells were collected when control cells were in S-phase (+14 h).
- B FACS analysis of HeLa cells, synchronised in M-phase and released into G1 as in Fig 1E, and treated with DMSO (Ctl) or SMIFH2, collected at the time points indicated.
- C Asynchronous (AS) or double-thymidine block (DTB) S-phase-synchronised U2OS cells were treated for 2 h with DMSO, bleomycin (Bleo) or SMIFH2, and stained for  $\gamma$ H2AX. Corresponding FACS profiles are shown. Scale bar, 5  $\mu$ m.
- D Quantification of  $\gamma$ H2AX-positive cell number from experiment presented in (C), and in cells transiently transfected with mDia2 nuc-DAD or cyt-DAD constructs. Cells with > 10 foci were considered positive.
- E Left: Immunofluorescent images of control or SMIFH2-treated (1 h pre-treatment, 1 h co-incubation) U2OS cells pulsed for 1 h with EU. Scale bar, 5  $\mu$ m. Right: Quantification of EU signal intensity ( $n > 400$ ). Crosses, mean values; whiskers, 10<sup>th</sup> and 90<sup>th</sup> percentiles.
- F Left: Immunofluorescent images of U2OS cells transfected with GFP-mDia2 nuc-DAD or cyt-DAD constructs, pulsed for 1 h with EU. Right: Quantification of EU incorporation ( $n > 100$ ,  $n = 61$  and  $n = 47$ , respectively). Scale bar, 5  $\mu$ m. Red arrows: examples of non-transfected cells; green arrows: examples of GFP-expressing (transfected) cells. Positions of arrows are the same in both panels. Graphs: crosses, mean values; whiskers, 10<sup>th</sup> and 90<sup>th</sup> percentiles.

Source data are available online for this figure.





**Figure EV4. Active nuclear transport requires actin dynamics.**

- A Immunofluorescence images of nuclei formed in control extracts, or extracts supplemented with the indicated drug or MICAL2 recombinant protein. DNA was stained with Hoechst and the number of normally assembled nuclei was determined. Scale bar, 50  $\mu$ m.
- B Immunofluorescence images of nuclei formed in control or CytD (CD)- or SMIFH2-treated extracts as in Fig 5B. Nuclear membranes were visualised with the lipid dye DHCC. Nuclei were analysed at 60 min. Scale bar, 10  $\mu$ m.
- C Scheme: Nuclei were formed in control extract or in the presence of CytD (CD), SMIFH2, WGA or Triton; at 35 min Dextran10-Alexa488 (Dex10-A488) or Dextran70-rhodamine (Dex70-rhod) were added; nuclei were imaged directly at 50 min. Scale bar, 10  $\mu$ m.
- D Scheme: Nuclei were formed in control extract; at 45 min, CytD (CD), SMIFH2, WGA or Triton was added, followed by the addition of Dextran10-Alexa488 (Dex10-A488) or Dextran70-rhodamine (Dex70-rhod); nuclei were imaged directly at 75 min. Scale bar, 10  $\mu$ m.
- E Western blots of total nuclear fractions in control and formin-inhibited (SMIFH2) extracts, probed with antibodies to the NUPs indicated; the same number of nuclei was analysed for each condition.
- F Immunofluorescence images of nuclei formed for 5 and 15 min in control or cytochalasin D-treated extracts, stained for DNA, Elys, RCC1, importin- $\beta$  and FG-NUPs (mAb414). Scale bar, 10  $\mu$ m.

Source data are available online for this figure.



**Figure EV5. Ongoing nuclear transport is required to promote DNA replication.**

- A Replication assay in control extract and in extract supplemented with WGA at the concentrations indicated (mg/ml).
- B, C XEE was control (Mock) or WGA-depleted (WGA-bpΔ), and assayed for depletion efficiency (after one (1x) and two (2x) rounds of depletion) by Western blot with mAb414 (B) and replication (C).
- D Scheme: Nuclei were formed in extract containing aphidicolin to block initiation of DNA replication, then transferred to a second extract, control or treated with 0.1% Triton X-100, and supplemented with Dextran70-rhodamine (Dex70-rhod); nuclei were imaged directly 15 min later. Scale bar, 10 μm.
- E Immunofluorescence images of nuclei formed for 60 min in control and geminin (40 nM)-containing extracts, stained for DNA, NUPs (mAb414) and lamin B3. Scale bar, 10 μm.
- F Replication time course of control and geminin-treated extract.
- G Replication time course of sperm chromatin in NPE extract treated with SMIFH2 or 2.4 formin inhibitor (mean values of two replicates), both used at 200 μM.
- H Replication time course of ssDNA in high-speed extract, control (Ctl) or in the presence of SMIFH2 (mean ± SEM; *n* = 3 and 4, respectively).

Source data are available online for this figure.
