# Supplementary material
Source: PubMed Central journal article supplement (PMC5666611)

**Figure 3**

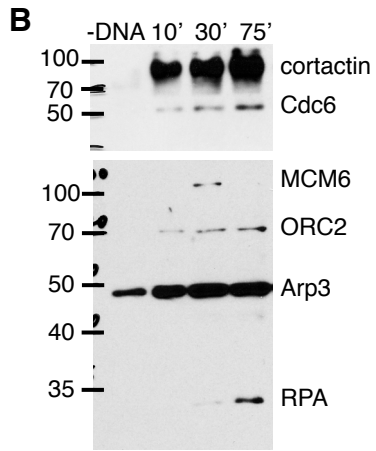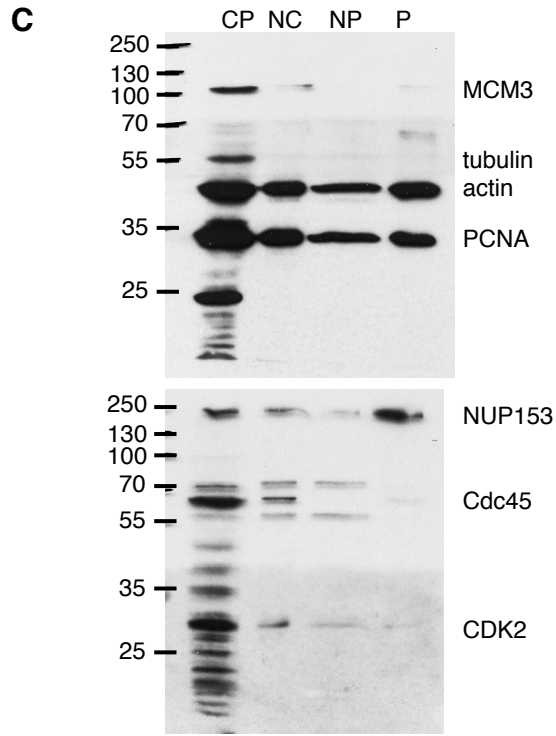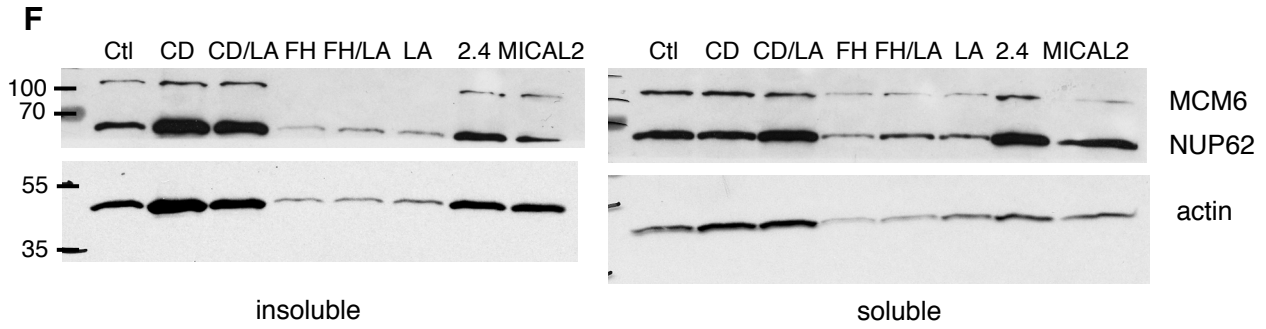

Supplement: EMBJ-36-3212-s010.pdf [file EMBJ-36-3212-s010.pdf]

**Figure 4**

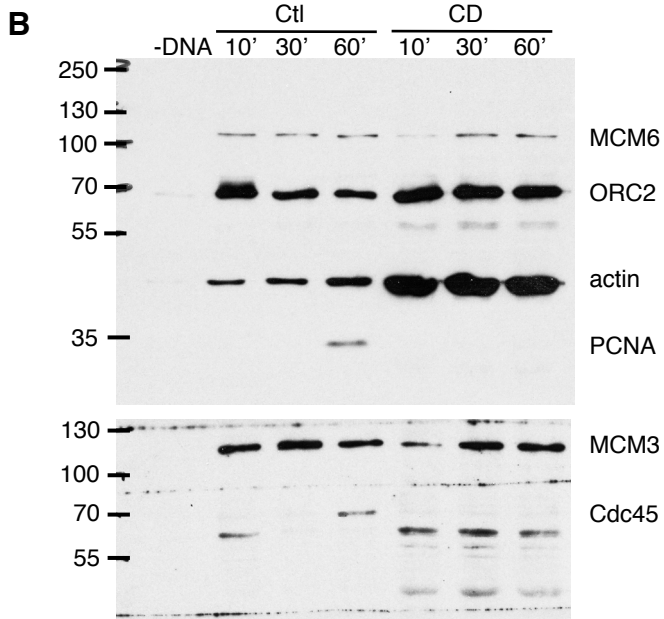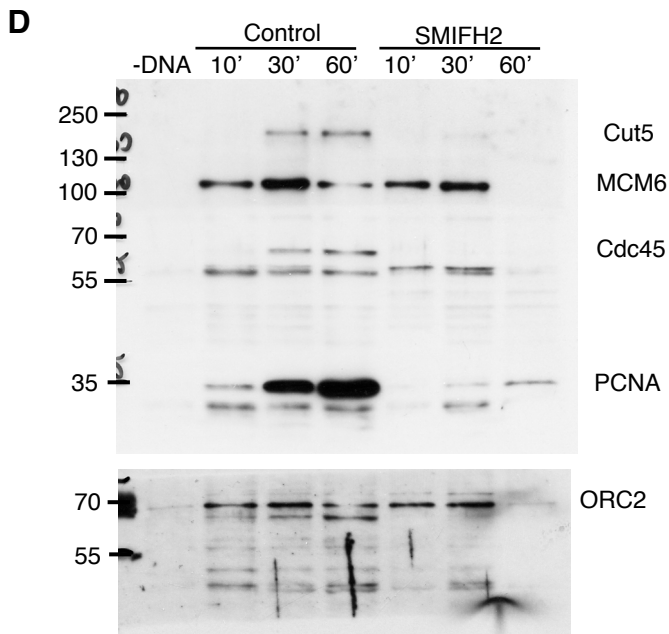

Supplement: EMBJ-36-3212-s011.pdf [file EMBJ-36-3212-s011.pdf]
